# Supplementary material for: Protein ligation for the assembly and study of nonribosomal peptide synthetase megaenzymes
Source: Royal Society of Chemistry journal article supplement (doi:10.1039/d4cb00306c), 2025-01-01
Supplement: d4cb00306c1.pdf [file d4cb00306c1.pdf]

**Supplementary Information:**

**Protein ligation for the assembly and study of nonribosomal peptide synthetase  
megaenzymes**

Angelos Pistofidis<sup>1</sup>, T. Martin Schmeing<sup>1</sup>

<sup>1</sup>Department of Biochemistry and Centre de recherche en biologie structurale, McGill University,  
Montréal, QC, H3G 0B1, Canada

**Supplementary Table 1: Crystallographic data and refinement statistics**

| <b>Data collection</b>                                  | <b>F<sub>1</sub>A<sub>1</sub>T<sub>1</sub>(Val)-C<sub>2</sub>A<sub>2</sub>T<sub>2</sub>(Gly)<br/>(PDB: 9MEH)</b> |
|---------------------------------------------------------|------------------------------------------------------------------------------------------------------------------|
| Space group                                             | P2 <sub>1</sub> 2 <sub>1</sub> 2 <sub>1</sub>                                                                    |
| Cell dimensions                                         |                                                                                                                  |
| <i>a</i> , <i>b</i> , <i>c</i> (Å)                      | 119.24, 166.28, 178.49                                                                                           |
| $\alpha$ , $\beta$ , $\gamma$ (°)                       | 90, 90, 90                                                                                                       |
| Resolution (Å)                                          | 50.00-3.60 (3.66-3.60)                                                                                           |
| <i>R</i> <sub>merge</sub>                               | 0.129 (2.49)                                                                                                     |
| <i>I</i> / $\sigma$ <i>I</i>                            | 18.6 (0.875)                                                                                                     |
| Completeness (%)                                        | 99.9 (100)                                                                                                       |
| Redundancy                                              | 11.6 (11.3)                                                                                                      |
| CC <sub>1/2</sub>                                       | 1.0 (0.489)                                                                                                      |
| <b>Refinement</b>                                       |                                                                                                                  |
| Resolution (Å)                                          | 48.38-3.60                                                                                                       |
| No. reflections                                         | 40600                                                                                                            |
| <i>R</i> <sub>work</sub> / <i>R</i> <sub>free</sub> (%) | 26.7 / 27.4                                                                                                      |
| No. atoms                                               | 14432                                                                                                            |
| Protein                                                 | 14419                                                                                                            |
| Ligand/ion                                              | 13                                                                                                               |
| Water                                                   | 0                                                                                                                |
| <i>B</i> -factors                                       | 196.89                                                                                                           |
| Protein                                                 | 196.86                                                                                                           |
| Ligand/ion                                              | 230.2                                                                                                            |
| Water                                                   | -                                                                                                                |
| R.m.s. deviations                                       |                                                                                                                  |
| Bond lengths (Å)                                        | 0.002                                                                                                            |
| Bond angles (°)                                         | 0.46                                                                                                             |

**Supplementary Table 2: Primers used for cloning and mutagenesis of constructs**

| Name                   | Sequence                                                                  |
|------------------------|---------------------------------------------------------------------------|
| pBACt_FAT_NGL_Ins_For  | GCGTGAGCAGAGAATTTGTACTTCCAAGGTAAAC                                        |
| pBACt_FAT_NGL_Ins_Rev  | GTACAAATTCTCTGCTCACGCTTAAAGACCATTACCTGCTTTTGCTCCGTAAGCAGAC                |
| pBACt_GL_CAT_Ins_For   | CCGAAAACCTGTATTTTCAGGGCCTCTGGAGCCTTTGCGAGAGCTGG                           |
| pBACt_GL_CAT_Ins_Rev   | GCCCTGAAAATACAGGTTTTCGGATCCGG                                             |
| pBACt_SrtA_FAT_Ins_For | CTTACGGAGCAAAAGCAGGTGCTTCCTGAAACTGGTTAAGCGTGAGCAGAGAATTTGTACTTCCAAGGTAAAC |
| pBACt_SrtA_FAT_Ins_Rev | CACCTGCTTTTGCTCCGTAAGCAGAC                                                |
| pBACt_SrtA_CAT_Ins_For | CCGAAAACCTGTATTTTCAGGGCGGCGGAGCCTGGAGCCTTTGCGAGAG                         |
| pBACt_SrtA_CAT_Ins_Rev | CTGAAAATACAGGTTTTCGGATCCGGTACCCAG                                         |
| LgrABmdB_+NGL_For      | AACGTCTGCTTACGGAGCAAAAGCAGGTGAATGGTCTTCTGGAGCCTTTGCGAGAGCTGGACG           |
| LgrABmdB_+NGL_Rev      | CGTCCAGCTCTCGCAAAGGCTCCAGAAGACCATTACCTGCTTTTGCTCCGTAAGCAGACGTT            |
| LgrABmdB_+LPETGGG_For  | GTCTGCTTACGGAGCAAAAGCAGGTGCTTCCTGAAACTGGTGGCGGCAGCCTGGAGCCTTTGCGAGAG      |
| LgrABmdB_+LPETGGG_Rev  | CTCTCGCAAAGGCTCCAGGCTGCCGCCACCAGTTTCAGGAAGCACCTGCTTTTGCTCCGTAAGCAGAC      |
| LgrABmdB_+SrtA_Δ5_For  | GCTTCCTGAAACTGGTGGCGGCCGAGAGCTGGACGAGCAAGCG                               |
| LgrABmdB_+SrtA_Δ5_Rev  | CGTTGCTCGTCCAGCTCTCGGCCGCCACCAGTTTCAGGAAGC                                |

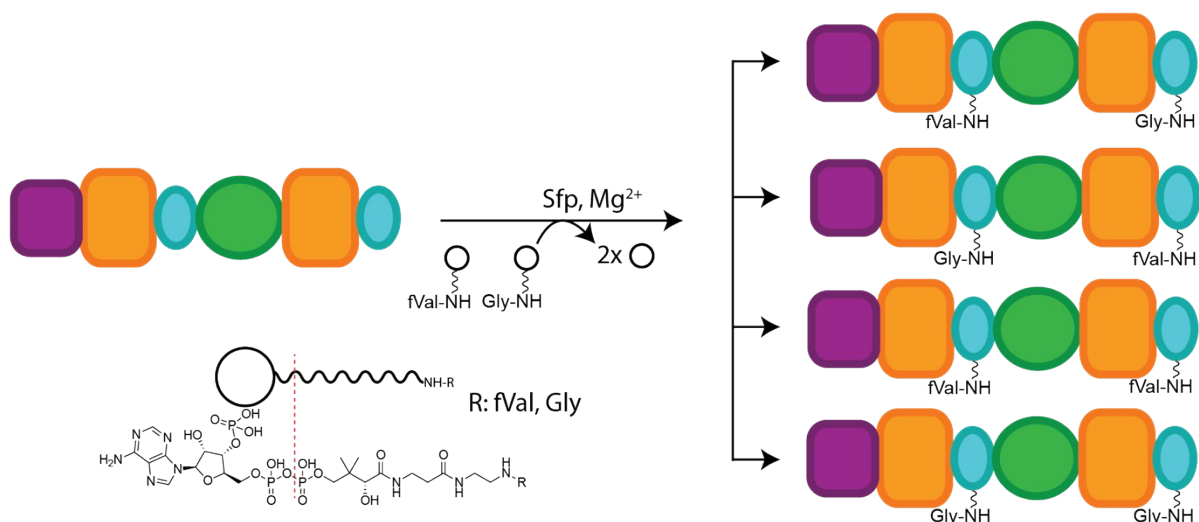

### Supplementary Figure 1: Loading F<sub>1</sub>A<sub>1</sub>T<sub>1</sub>C<sub>2</sub>A<sub>2</sub>T<sub>2</sub> with two different substrate analogues would result in a heterogeneous sample

Specifically loading two different amino acyl-ppant analogues onto their respective T domains (fVal-NH-ppant on T<sub>1</sub> and Gly-NH-ppant on T<sub>2</sub>) in F<sub>1</sub>A<sub>1</sub>T<sub>1</sub>C<sub>2</sub>A<sub>2</sub>T<sub>2</sub> is impossible because the promiscuity of the phosphopantetheine transferase enzyme, Sfp<sup>1</sup>. Attempting to do so would produce the mixed population shown on the right.

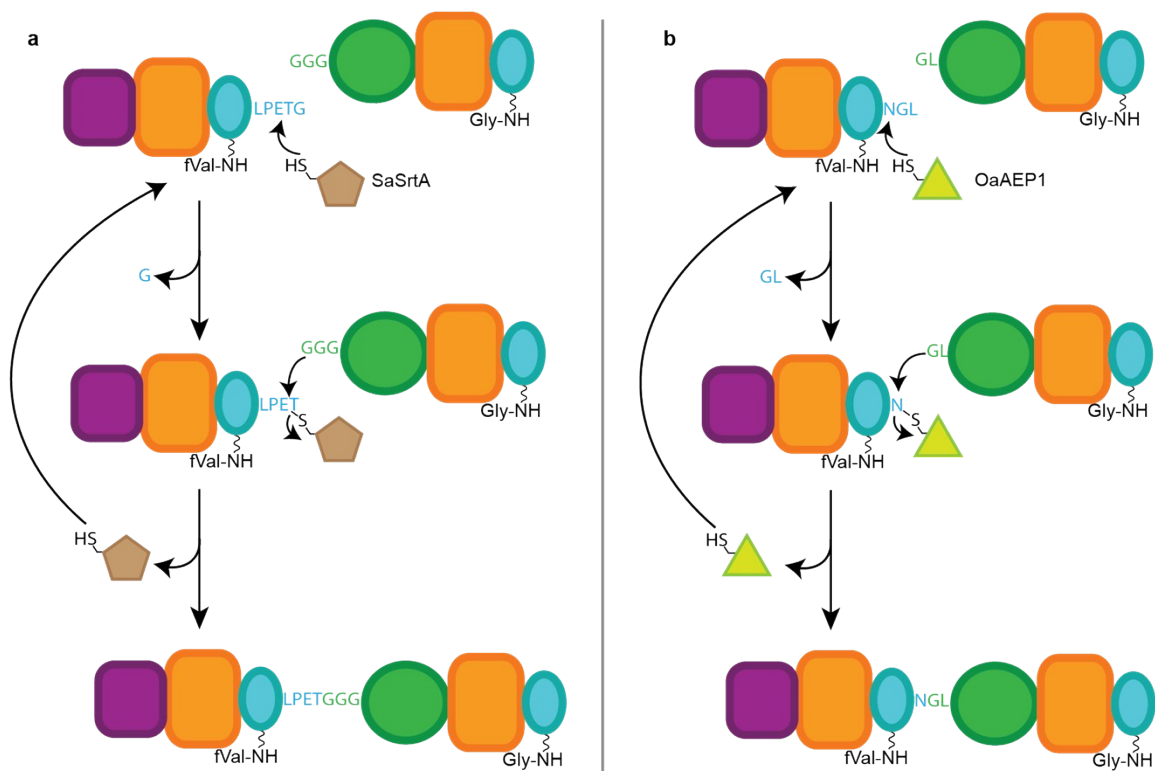

**Supplementary Figure 2: The mechanism of protein ligation by SaSrtA and OaAEP1.**

**a.** SaSrtA recognizes a Leu-Pro-Glu-Thr-Gly sequence at the C-terminus of  $F_1A_1T_1^{Srt}$  and, via a conserved cysteine, displaces the glycine to form a reactive thioester with the threonine. A Gly-Gly-Gly sequence at the N-terminus of  $^{Srt}C_2A_2T_2$  resolves the thioester to form a Leu-Pro-Glu-Thr-Gly-Gly-Gly ligation scar and join the two modules ( $F_1A_1T_1-C_2A_2T_2$ ). **b.** OaAEP1 uses a similar mechanism but recognizes an Asn-Gly-Leu sequence at the C-terminus of  $F_1A_1T_1^{AEP1}$  and a Gly-Leu sequence at the N-terminus of  $^{AEP1}C_2A_2T_2$ .

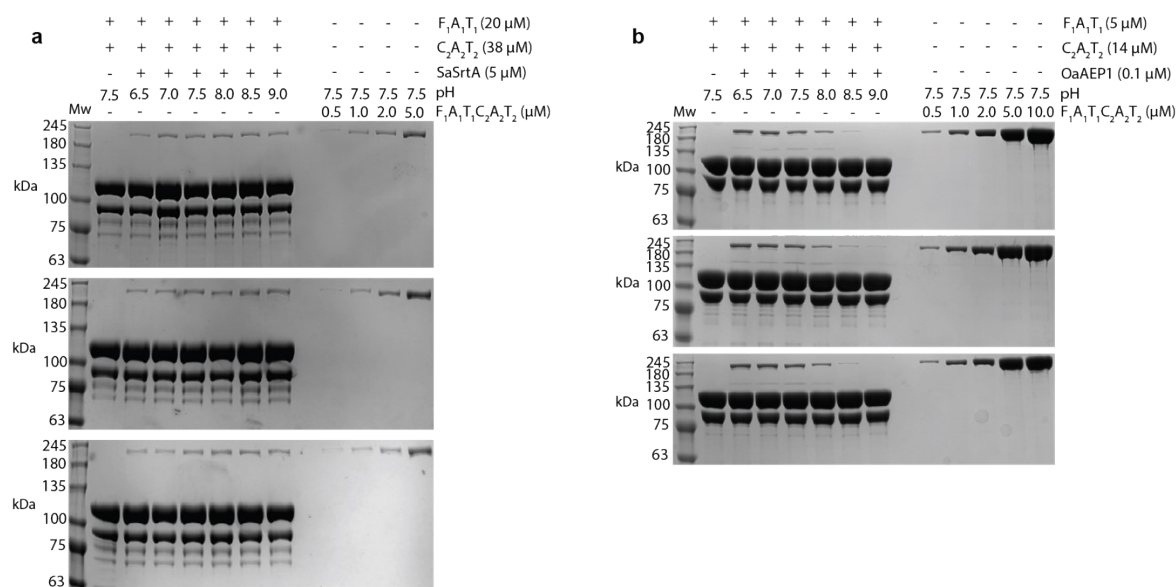

### Supplementary Figure 3: SDS-PAGE of pH variation on $F_1A_1T_1$ - $C_2A_2T_2$ formation by SaSrtA and OaAEP1

**a-b.** (a) OaAEP1 and (b) SaSrtA were incubated with appropriately sorting sequence labelled  $F_1A_1T_1$  and  $C_2A_2T_2$  at pHs between 6.5 and 9.0. Each gel in **a** and **b** represents a single replicate. On the left side of each gel is the negative control (no OaAEP1 or no SaSrtA) and the reactions at each pH (6.5 – 9.0). On the right side of each gel are known concentrations of  $F_1A_1T_1$ - $C_2A_2T_2$  used to prepare a calibration curve for the conversion of band intensities to yields ( $\mu$ M).

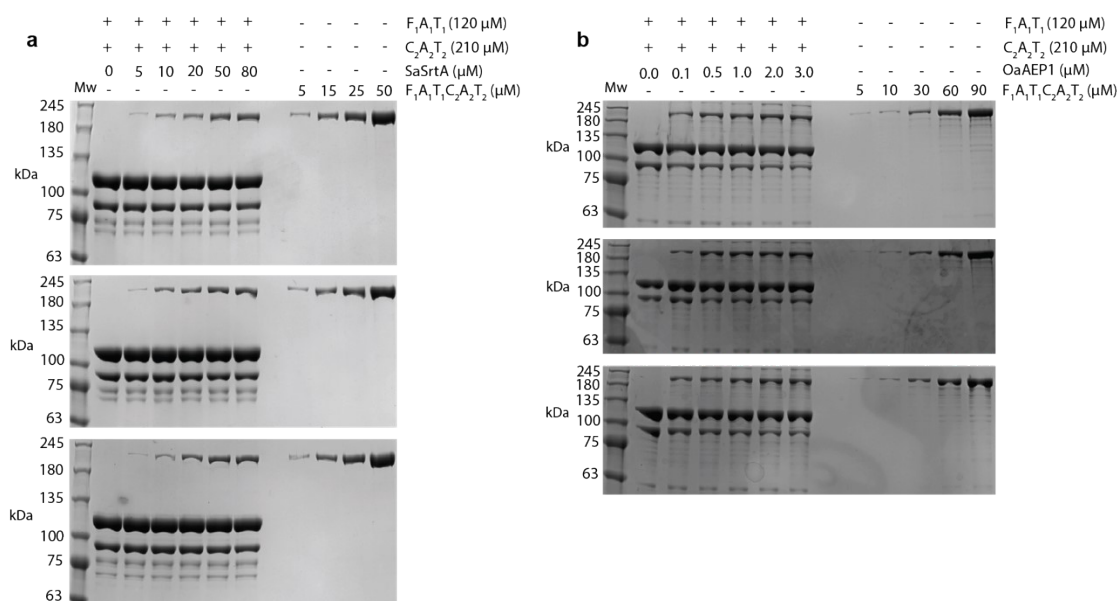

**Supplementary Figure 4: SDS-PAGE of  $F_1A_1T_1C_2A_2T_2$  formation with varying concentrations of SaSrtA and OaAEP1**

**a.** SaSrtA concentration was varied between 0 – 80  $\mu$ M. **b.** OaAEP1 concentration was varied between 0 and 3  $\mu$ M. In **a** and **b**, each gel represents one replicate of a total of three each. On the right side of each gel are known concentrations of  $F_1A_1T_1C_2A_2T_2$  used to prepare a calibration curve for the conversion of band intensities to yields ( $\mu$ M).





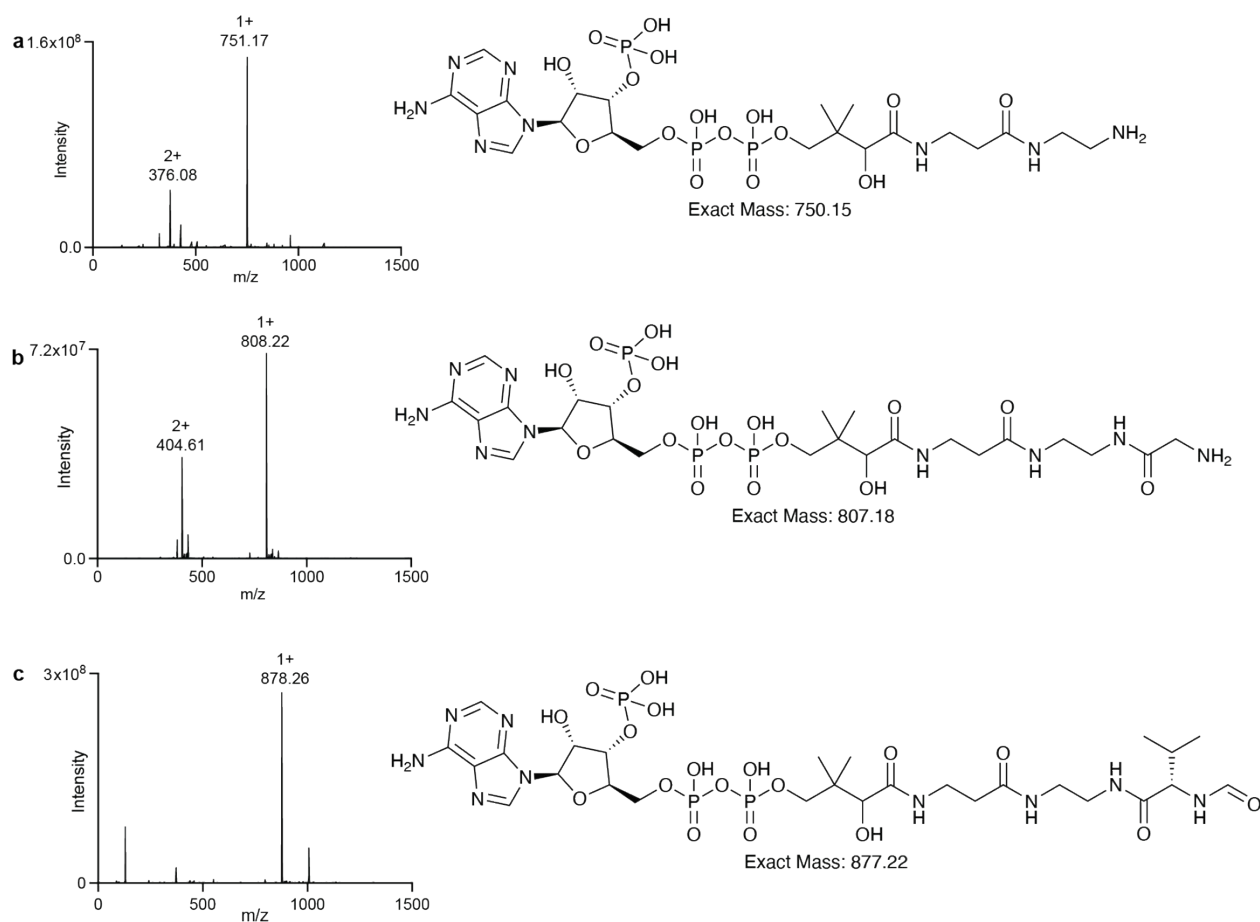

**Supplementary Figure 6: Direct infusion of the non-hydrolyzable substrate analogue precursors**

**a.**  $\text{NH}_2\text{-CoA}$ , **b.**  $\text{Gly-NH-CoA}$  and **c.**  $\text{fVal-NH-CoA}$  were synthesized using a previously established protocol <sup>2</sup> and were confirmed by direct infusion onto an amaZon speed EDT (Bruker) ion trap mass spectrometer. Full characterization of these molecules by LC-MS and NMR was carried out in a previous study by our lab <sup>3</sup>.

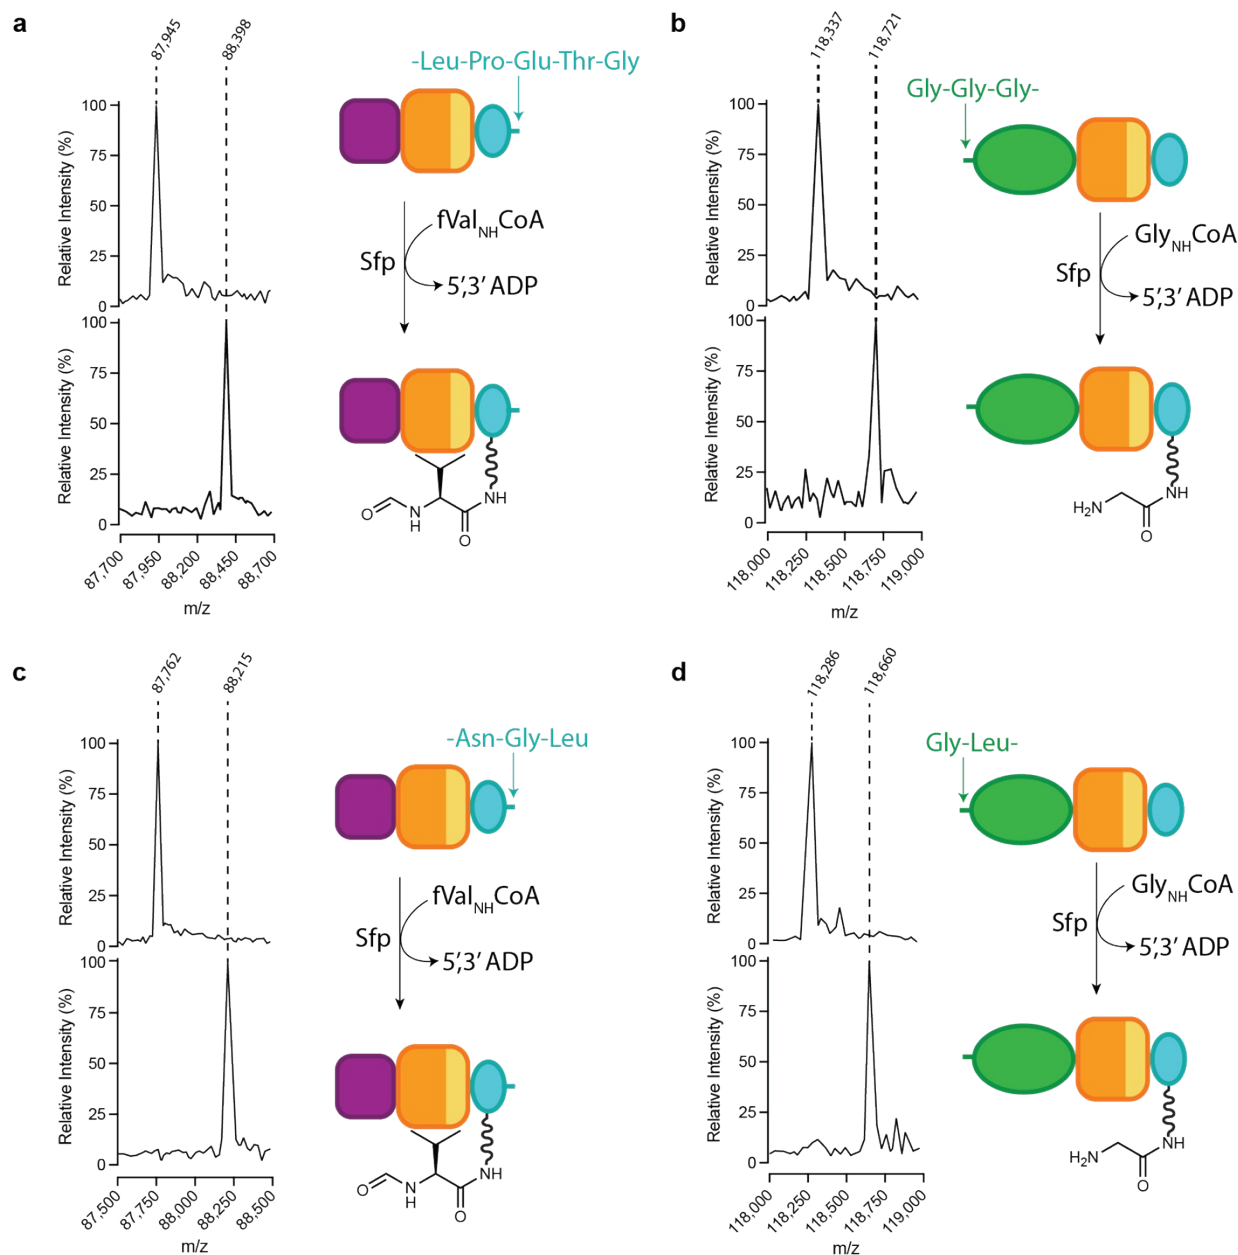

### Supplementary Figure 7: Loading the amino acyl substrate analogues on the T domains of $F_1A_1T_1$ and $C_2A_2T_2$

Intact protein LC-MS showing the loading of: **a.**  $fVal_{NH}$ -ppant on  $F_1A_1T_1^{Srt}$  (expected mass for apo: 87,962, observed mass for apo: 87,945, expected mass for modified: 88,414, observed mass for modified: 88,398), **b.**  $Gly_{NH}$ -ppant on  $SrtC_2A_2T_2$  (expected mass for apo: 118,355, observed mass for apo: 118,337, expected for mass modified: 118,737, observed mass for modified: 118,721), **c.**  $fVal_{NH}$ -ppant on  $F_1A_1T_1^{AEP1}$  (expected m/z apo: 87,749, observed m/z apo: 87,762, expected m/z modified: 88,201, observed m/z modified: 88,215), and **d.**  $Gly_{NH}$ -ppant on  $AEP1C_2A_2T_2$  (expected mass for apo:

118,268, observed mass for apo: 118,286, expected mass for modified: 118,650, observed mass for modified: 118,660).

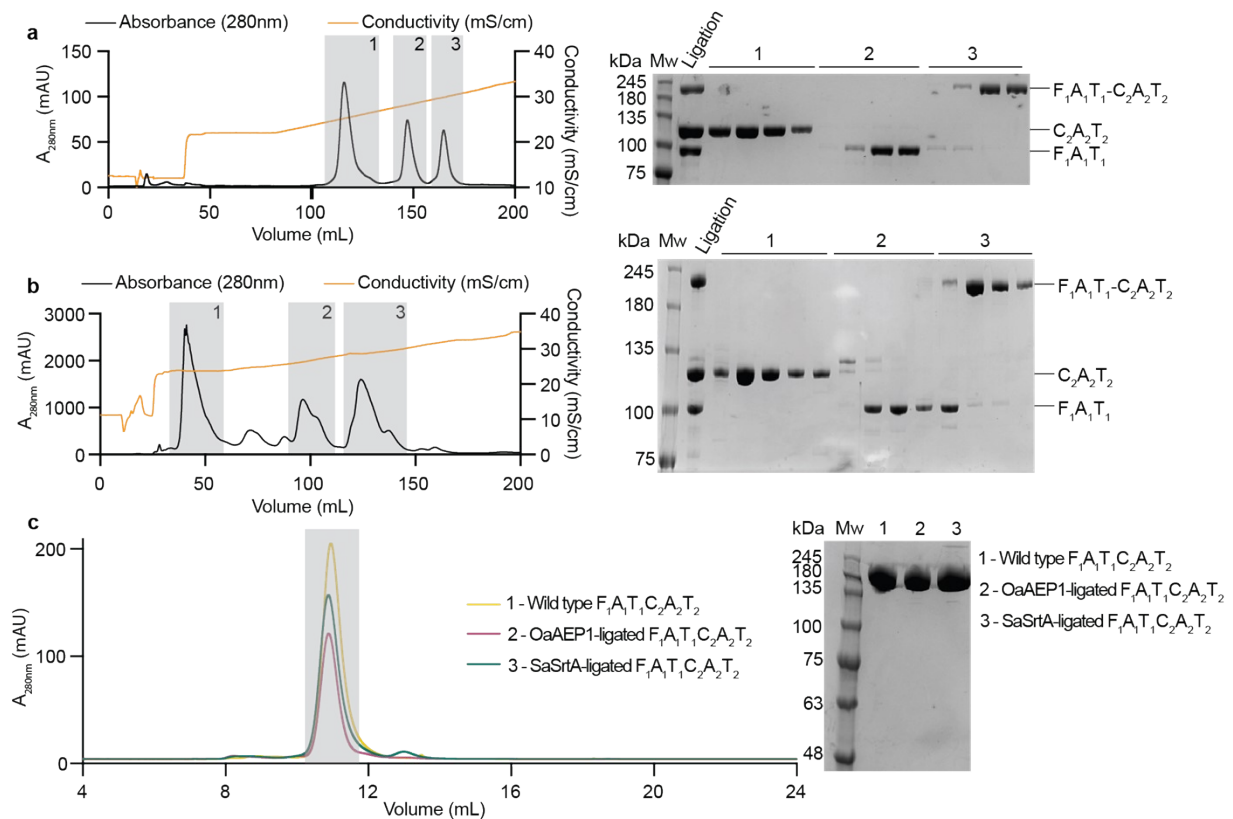

### Supplementary Figure 8: Purification of the F<sub>1</sub>A<sub>1</sub>T<sub>1</sub>-fVal-C<sub>2</sub>A<sub>2</sub>T<sub>2</sub>-Gly complexes

**a.** Purification of SaSrtA-ligated F<sub>1</sub>A<sub>1</sub>T<sub>1</sub>-fVal-C<sub>2</sub>A<sub>2</sub>T<sub>2</sub>-Gly by anion exchange chromatography. SDS-PAGE analysis of the elution peaks is shown on the right of the trace. **b.** Purification of OaAEP1-ligated F<sub>1</sub>A<sub>1</sub>T<sub>1</sub>-fVal-C<sub>2</sub>A<sub>2</sub>T<sub>2</sub>-Gly by anion exchange chromatography. SDS-PAGE analysis of the elution peaks is shown on the right of the trace. In **a** and **b** F<sub>1</sub>A<sub>1</sub>T<sub>1</sub>-C<sub>2</sub>A<sub>2</sub>T<sub>2</sub> elutes in peak 3 and F<sub>1</sub>A<sub>1</sub>T<sub>1</sub> and C<sub>2</sub>A<sub>2</sub>T<sub>2</sub> elute in peaks 2 and 1, respectively. **c.** Further purification of the ligated F<sub>1</sub>A<sub>1</sub>T<sub>1</sub>-fVal-C<sub>2</sub>A<sub>2</sub>T<sub>2</sub>-Gly complexes by size-exclusion chromatography using a Superdex 200 Increase 10/300 GL (S200) column. SaSrtA-ligated (green line) and OaAEP1-ligated (magenta line) F<sub>1</sub>A<sub>1</sub>T<sub>1</sub>-fVal-C<sub>2</sub>A<sub>2</sub>T<sub>2</sub>-Gly eluted as single peaks and eluted at the same volume as wild-type F<sub>1</sub>A<sub>1</sub>T<sub>1</sub>C<sub>2</sub>A<sub>2</sub>T<sub>2</sub> (yellow line). SDS-PAGE (on the right of the S200 trace) of the elution peaks shows that F<sub>1</sub>A<sub>1</sub>T<sub>1</sub>-C<sub>2</sub>A<sub>2</sub>T<sub>2</sub> complexes ligated by SaSrtA and OaAEP1 are highly pure.

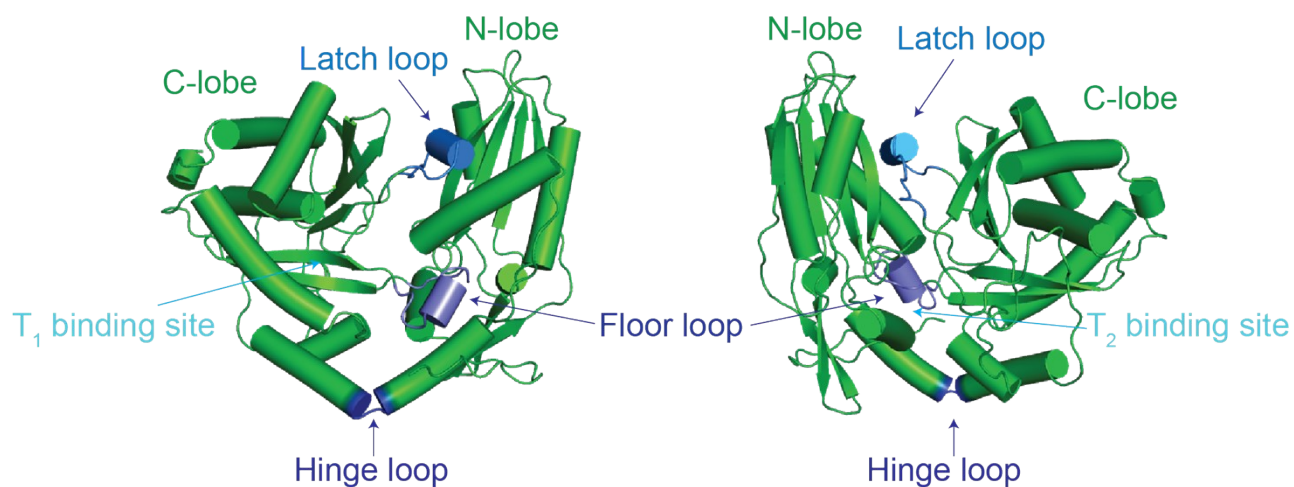

### Supplementary Figure 9: Structure of the of F<sub>1</sub>A<sub>1</sub>T<sub>1-fVal</sub>C<sub>2</sub>A<sub>2</sub>T<sub>2-Gly</sub> C domain

Architecture of C<sub>2</sub> domain as seen in the dimodular LgrA solved here. The left panel depicts the donor substrate binding face and the right panel depicts the acceptor substrate binding face. The N- and C-lobes are labelled, the latch loop is shown in blue, the floor loop in light purple and the hinge loop in dark blue.

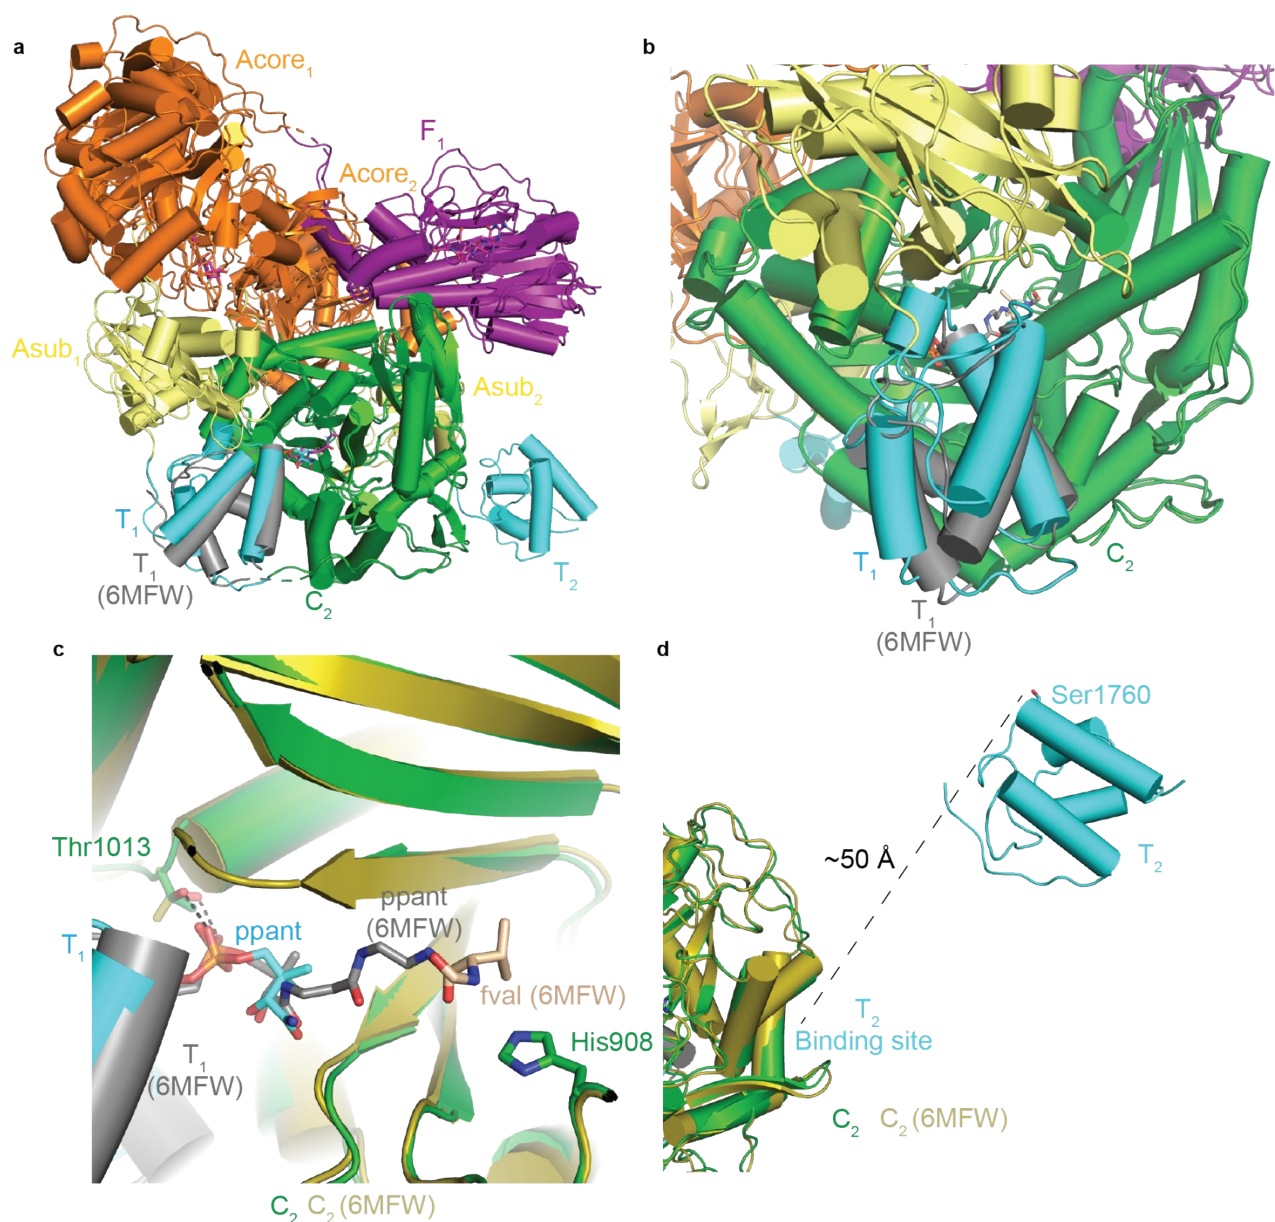

**Supplementary Figure 10: Comparison of  $F_1A_1T_1\text{-fValC}_2A_2T_2\text{-Gly}$  with the high resolution  $F_1A_1T_1\text{-fValC}_2$  structure**

**a.** Alignment of the  $F_1A_1T_1\text{-fValC}_2A_2T_2\text{-Gly}$  complex with the high-resolution  $F_1A_1T_1\text{-fValC}_2$  structure (PDB accession code: 6MFW)<sup>2</sup>. The four domains of  $F_1A_1T_1\text{-fValC}_2$  and  $F_1A_1T_1\text{-fValC}_2A_2T_2\text{-Gly}$  assume a very similar conformation. **b.** Close-up view of  $T_1$  from  $F_1A_1T_1\text{-fValC}_2A_2T_2\text{-Gly}$  and  $F_1A_1T_1\text{-fValC}_2$  overlaid to highlight the similar  $T_1$  orientation observed in the two structures. **c.** Zoom into the  $T_1$  binding site showing the short portion of the ppant from the  $F_1A_1T_1\text{-fValC}_2A_2T_2\text{-Gly}$  structure aligning well with the fVal<sub>NH</sub>-ppant substrate analogue observed in  $F_1A_1T_1\text{-fValC}_2$ .  $T_1$  ppant phosphate interacts with Thr1013 in the C-lobe. **d.**  $T_2$  is  $\sim 50\text{\AA}$  away from the expected binding site on the acceptor face of  $C_2$ .

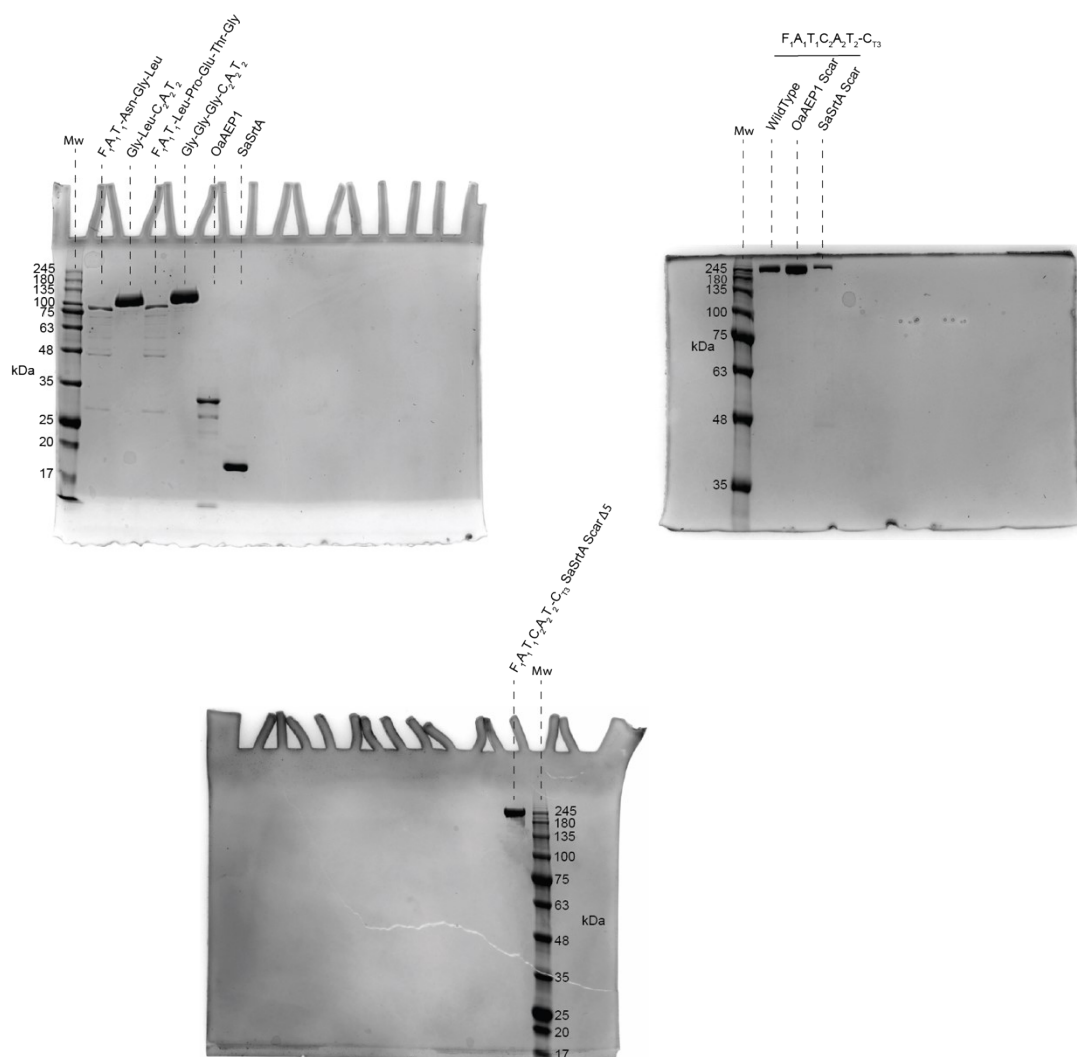

**Supplementary Figure 11: SDS gels showing all proteins used in this study.**

### Supplementary References

1. L. E. Quadri, P. H. Weinreb, M. Lei, M. M. Nakano, P. Zuber and C. T. Walsh, *Biochemistry*, 1998, **37**, 1585-1595.
2. J. M. Reimer, M. Eivaskhani, I. Harb, A. Guarne, M. Weigt and T. M. Schmeing, *Science*, 2019, **366**.
3. A. Pistofidis, P. Ma, Z. Li, K. Munro, K. N. Houk and T. M. Schmeing, *Nature*, 2024, DOI: 10.1038/s41586-024-08417-6.
